# Supplementary material for: Monomorphic Epitheliotropic Intestinal T-Cell Lymphoma in Asia Frequently Shows SETD2 Alterations
Source: PubMed Central journal article supplement (PMC7759862; doi:10.3390/cancers12123539), 2020-11-27
Supplement: cancers-12-03539-s001.pdf [file cancers-12-03539-s001.pdf]

Supplementary Materials:

## Monomorphic Epitheliotropic Intestinal T-Cell Lymphoma in Asia Frequently Shows *SETD2* Alterations

Sakura Tomita <sup>1,\*</sup>, Yara Yukie Kikuti <sup>1</sup>, Joaquim Carreras <sup>1</sup>, Rika Sakai <sup>2</sup>, Katsuyoshi Takata <sup>3</sup>, Tadashi Yoshino <sup>3</sup>, Silvia Bea <sup>4</sup>, Elias Campo <sup>4</sup>, Edoardo Missiaglia <sup>5</sup>, Justine Bouilly <sup>5</sup>, Audrey Letourneau <sup>5</sup>, Laurence de Leval <sup>5</sup> and Naoya Nakamura <sup>1</sup>

Table S1. Summary of DNA sequencing and IHC of H3K36me3, listed by gene symbol.

| Case | <i>SETD2</i>                                                                |        |          | <i>JAK1</i>                                                    |        | <i>JAK3</i>                                        |        | <i>STAT5B</i>                                        |        | Others                                                          |        |
|------|-----------------------------------------------------------------------------|--------|----------|----------------------------------------------------------------|--------|----------------------------------------------------|--------|------------------------------------------------------|--------|-----------------------------------------------------------------|--------|
|      | Mutations                                                                   | CNV    | IHC      | Mutations                                                      | CNV    | Mutations                                          | CNV    | Mutations                                            | CNV    | Mutations                                                       | CNV    |
| 1    | Inframe indel<br>exon 20<br>p.<br>Phe2481_Gln2484del<br>(Probably damaging) | NA     | Negative | WT                                                             | NA     | Missense<br>exon 13<br>p. Ala573Val<br>(Damaging)  | NA     | WT                                                   | NA     |                                                                 |        |
| 2    | Frameshift indel<br>exon 20<br>p. Tyr2489Trpfs*6<br>(Probably damaging)     | Normal | Negative | Missense<br>exon 22<br>p. Lys1026Glu<br>(Probably<br>damaging) | Normal | WT                                                 | Normal | WT                                                   | Gain   |                                                                 |        |
| 3    | Missense<br>exon 7<br>p. Cys1631Phe<br>(Uncertain)                          | Normal | Negative | WT                                                             | Normal | Missense<br>exon 13<br>p. Ala573Val<br>(Damaging)  | Normal | Missense<br>exon 18<br>p.<br>Val712Glu<br>(Damaging) | Normal |                                                                 |        |
| 4    | Missense<br>exon 20<br>p. Leu2486Arg<br>(Probably damaging)                 | Loss   | Negative | Missense<br>exon 15<br>p. Ser703Ile<br>(Damaging)              | Normal | WT                                                 | Normal | WT                                                   | Normal | <i>TP53</i><br>Missense<br>exon 7<br>p. Gly244Asp<br>(Damaging) | Normal |
| 5    | Substitution (intron)<br>exon 5<br>c. 4715+1G>T<br>(Probably damaging)      | Normal | Negative | WT                                                             | Normal | Splicing<br>exon 20<br>c. 2805+7G>C<br>(Uncertain) | Normal | Missense<br>exon 16<br>p.                            | Normal |                                                                 |        |

|   |                                                                                                                      |      |          |                                                               |        |  |  |  |                                                               |        |                                                      |        |                                                                              |        |
|---|----------------------------------------------------------------------------------------------------------------------|------|----------|---------------------------------------------------------------|--------|--|--|--|---------------------------------------------------------------|--------|------------------------------------------------------|--------|------------------------------------------------------------------------------|--------|
|   |                                                                                                                      |      |          |                                                               |        |  |  |  | Asn642His<br>(Damaging)                                       |        |                                                      |        |                                                                              |        |
|   |                                                                                                                      |      |          |                                                               |        |  |  |  | Missense<br>exon 13<br>p. Ala573Val<br>(Damaging)             |        |                                                      |        |                                                                              |        |
| 6 | WT                                                                                                                   | Loss | Positive | WT                                                            | Gain   |  |  |  | Missense<br>exon 11<br>p. Met511Ile<br>(Probably<br>damaging) | Normal | WT                                                   | Normal |                                                                              |        |
| 7 | Splicing<br>exon 6<br>c. 4716-1G>A<br>(Probably damaging)<br>Splicing<br>exon 1<br>c. 71+1G>A<br>(Probably damaging) | NA   | Negative | Missense<br>exon 17<br>p. Leu783Phe<br>(Probably<br>damaging) | NA     |  |  |  | Missense<br>exon 15<br>p. Val674Ala<br>(Probably<br>damaging) | Normal | WT                                                   | Normal |                                                                              |        |
| 8 | WT                                                                                                                   | Loss | Negative | Missense<br>exon 15<br>p. Ser703Cys<br>(Damaging)             | Normal |  |  |  | Missense<br>exon 15<br>p. Val674Ala<br>(Probably<br>damaging) | Normal | WT                                                   | Normal | <i>PIK3CD</i><br>Missense<br>exon 8<br>p. Met339Lys<br>(Uncertain)           | Normal |
|   |                                                                                                                      |      |          |                                                               |        |  |  |  |                                                               |        |                                                      |        | <i>TP53</i><br>Missense<br>exon 10<br>p. Arg337His<br>(Probably<br>damaging) | Normal |
| 9 | Missense<br>exon 11<br>p. Ser1769Tyr<br>(Uncertain)                                                                  | Loss | Negative | WT                                                            | Normal |  |  |  | WT                                                            | Normal | Missense<br>exon 16<br>p.<br>Asn642His<br>(Damaging) | Normal | <i>ATM</i><br>Missense<br>exon 19<br>p. Pro960His<br>(Uncertain)             | Normal |

The data of CNV are from reference 15.  
Abbreviations: CNV, copy number variation; NA, not analysed; WT, wild type

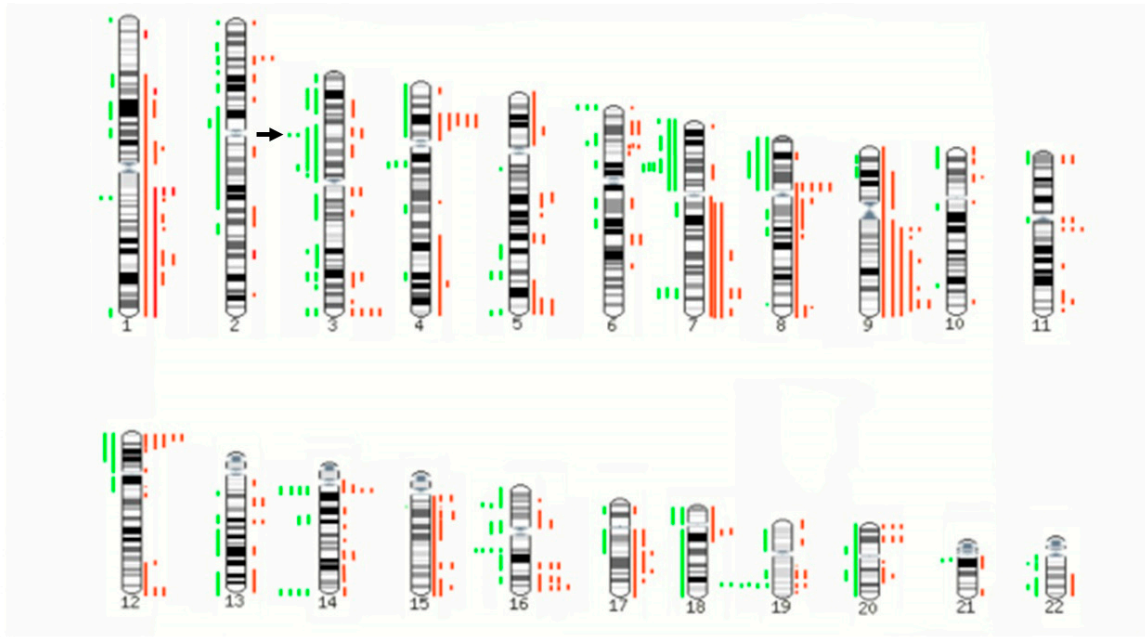

**Figure S1.** Summary view of the copy-number alterations across the genome (from reference 15). In the karyoview the red lines to the right of the chromosomes represent areas of gain and green lines on the left side of the chromosomes represent areas of loss. The genome profile of MEITL in Japan was characterized by multiple regions of gains and losses such as gain of 4p15.1 (5/8, 62.5%), 7q34 (5/8, 62.5%), 8p11.23 (5/8, 62.5%), 9q22.31 (5/8, 62.5%), 9q33.2 (5/8, 62.5%), 9q34.13 (6/8, 75%) and losses of 7p14.1 (6/8, 75%), 19q33.33 (6/8, 75%). Loss of *SETD2* at 3p21 in 4 cases is marked with an arrow.
